# Supplementary material for: Knowledge, attitudes and practices of COVID-19 among income-poor households in the Philippines: A cross-sectional study
Source: PubMed Central journal article supplement (PMC7294392; doi:10.7189/jogh.10.011007), 2020-06
Supplement: jogh-10-011007-s001.pdf [file jogh-10-011007-s001.pdf]

## Supplementary online material

### Knowledge, Attitudes and Practices (KAP) of the novel Coronavirus 2019 (COVID-19) among Income Poor Households in the Philippines: A cross-sectional study

#### CONTENTS

- 1 ICM 2019 Survey Covid-19 Questions
- 2 Table S1. Description of geographical area types where survey respondents resided
- 3 Note on exchange rate

#### Appendix S1. ICM 2019 Survey Covid-19 Questions

**kn\_0** Have you heard of the new coronavirus (Covid-19)?

- 1 Yes
- 0 No
- 98 I don't know

**kn\_1** What do you think? Can the new coronavirus be transmitted (caught or spread) by...?:

**kn\_1a** Cough and sneeze

- 1 Yes
- 0 No
- 98 I don't know

**kn\_1b** Face to face talking

- 1 Yes
- 0 No
- 98 I don't know

**kn\_1c** Handshakes or hugs

- 1 Yes
- 0 No
- 98 I don't know

**kn\_1d** Indirect hand contact (touching an item someone else touched)

- 1 Yes
- 0 No
- 98 I don't know

**kn\_1e** Food (sharing and eating from the same dish)

- 1 Yes
- 0 No
- 98 I don't know

**kn\_2** If you have symptoms like fever, cough, and sore throat, what would you do?  
*Select all that are appropriate.*

- 1 Stay at home and wait to get better
- 2 Use stored medicine at home
- 3 Contact *barangay* health worker
- 4 Seek antibiotics
- 5 Visit rural health unit (RHU)
- 6 Visit a pharmacy
- 7 Visit public hospital
- 8 Visit private hospital
- 9 Local hilot (traditional medicine)
- 66 Other (*please specify*)
- 98 I don't know

**att\_1** Has your daily life been disturbed (interrupted, changed) by the new coronavirus?  
*Has anything changed in your life since hearing about the new coronavirus?*

- 1 Yes
- 0 No

**att\_2** Do you worry about contracting the new coronavirus?

- 0 No
- 1 Yes, a little
- 2 Yes, very much

**pr\_0** Since the news of the coronavirus...

**pr\_1** Do you avoid crowded places?

- 1 Yes
- 0 No
- 98 I don't know

**pr\_2** Do you wash your hands more frequently?

- 1 Yes
- 0 No
- 98 I don't know

**pr\_3** Do you have access (can you buy or receive) to alcohol, hand sanitizer? (or have you bought more recently?)

- 1 Yes
- 0 No
- 98 I don't know

**pr\_4** Do you wear a face mask now because of the new coronavirus?

- 1 Yes
- 0 No

-98 I don't know

**pr\_4a** (IF pr\_4 = YES) What type of mask(s) do you wear?

*Select all that are appropriate.*

- 1 Motorcycle mask
- 2 Bandana
- 3 Surgical
- 4 N95
- 66 Other (please specify)

**pr\_4b** (IF pr\_4 = NO) If no, is it because...

*Select all that are appropriate.*

- 1 All are out of stock
- 2 They are too expensive
- 3 I gave it to someone in my family
- 4 I don't think it helps against coronavirus
- 66 Other (please specify)

**pr\_5** Do you keep a distance from people with influenza-like symptoms (flu/colds)?

*Ex: people coughing, sneezing, with fever, with runny nose, etc.*

- 1 Yes
- 0 No
- 98 I don't know

**inf\_1** Where did you learn and stay up to date about the new coronavirus?

*Select all that are appropriate.*

- 1 Television (news)
- 2 Radio
- 3 Social media (Facebook, Instagram, etc.)
- 4 Internet (websites, blogs, etc.)
- 5 Friends, relatives, and/or neighbours
- 6 Government officials (local government officials, *barangay* health workers, etc.)
- 7 Announcements at work
- 66 Other (please specify)

**kn\_3** How can you protect yourself against the new coronavirus?

*Select all that are appropriate.*

- 1 Hand washing
- 2 Face masks
- 3 Hand sanitizer
- 4 Social distancing (staying away from people who are sick)
- 5 Vitamins, Calamansi tea or other citrus fruit, herbal remedies
- 6 Avoiding large crowds
- 7 Drinking alcohol
- 8 Changing clothes often or after being in public
- 9 Ginger pouch

-66 Other (*please specify*)

## 2 Table S1

Table S1. Description of geographical area types where survey respondents resided

| <b>Geographical area type</b> | <b>Description</b>                                                                                                                                       |
|-------------------------------|----------------------------------------------------------------------------------------------------------------------------------------------------------|
| Rural                         | Rural communities are predominantly engaged in the agricultural industry, and households are relatively more spread out.                                 |
| Coastal                       | The proximity of households in coastal communities are a mixture of dense and semi-dense housing, and the main industry is fishing or collecting shells. |
| Urban                         | Urban communities are located within or in the vicinity of city centres and household density is higher than in rural settings.                          |

## 3 Note on exchange rate

The PHP/USD exchange rate was taken on April 27, 2020 (1 PHP = 0.019755 USD).
